# Supplementary material for: Single sample preparation for the simultaneous extraction of drugs, pharmaceuticals, cannabinoids and endogenous steroids in hair
Source: Royal Society of Chemistry journal article supplement (doi:10.1039/d2ay01325h), 2022-01-01
Supplement: d2ay01325h1.pdf [file d2ay01325h1.pdf]

## Supplemental

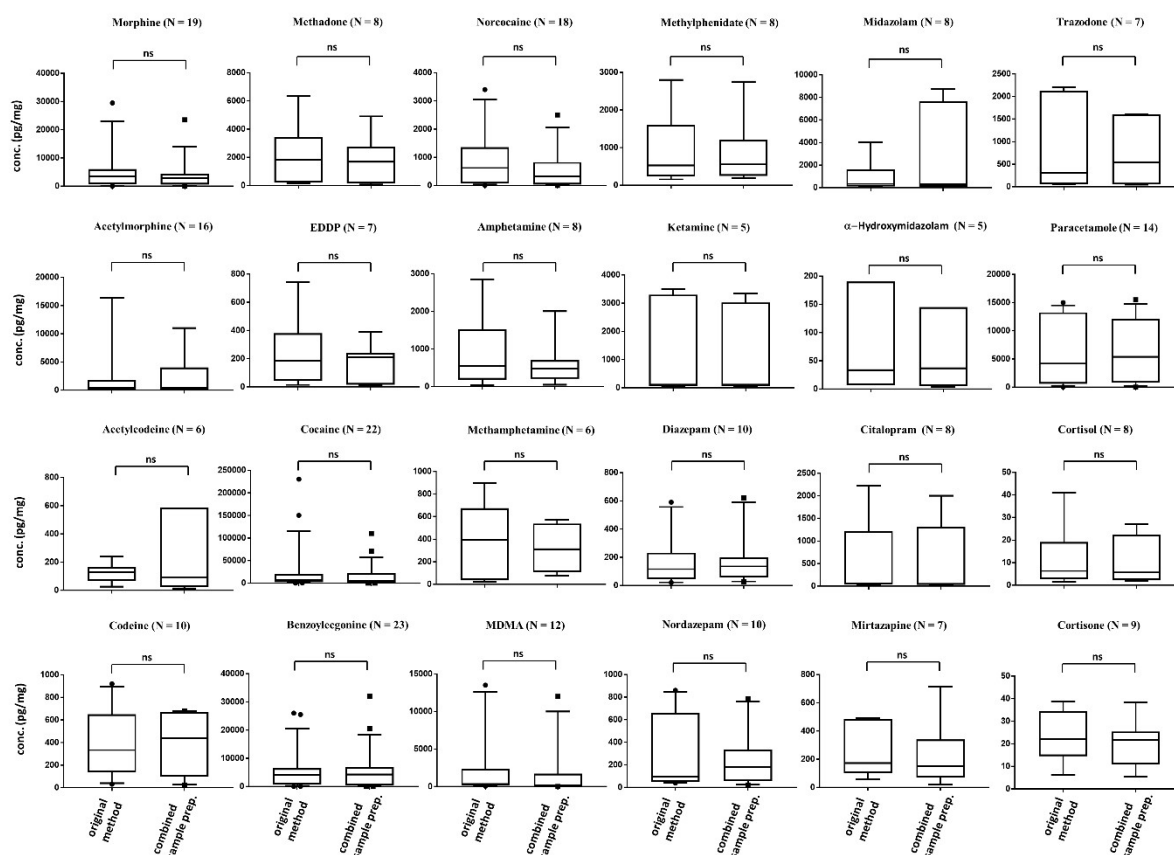

**Suppl.:** Comparative statistical analysis of concentrations in the original and the combined sample preparation. Box plots for different analytes: The boxes represent the 25<sup>th</sup> and 75<sup>th</sup> percentile, the black line in the box represents the median and the whiskers represent the 10<sup>th</sup> and 90<sup>th</sup> percentile. Statistical analysis was done by Mann-Whitney test or unpaired t-test. P-values > 0.05 were considered as not significant (ns),  $p < 0.05$  as significant, N = number of pairs. Only pairs with values over LOQ were considered for statistical analysis.
